# Supplementary material for: Population connectivity in voles (Microtus sp.) as a gauge for tall grass prairie restoration in midwestern North America
Source: PubMed Central journal article supplement (PMC8659414; doi:10.1371/journal.pone.0260344), 2021-12-09
Supplement: pone.0260344.s004.pdf [file pone.0260344.s004.pdf]

### *M. ochrogaster*: optimal number of genetic clusters

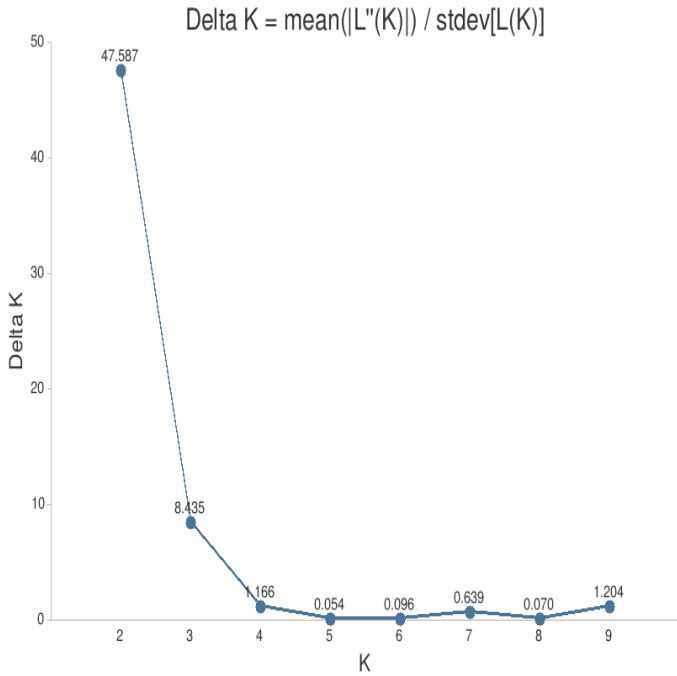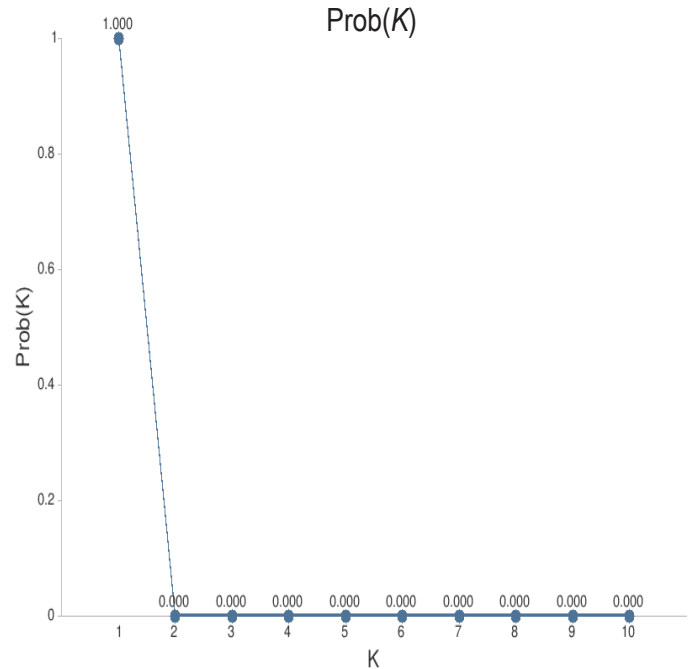

Delta K-statistic

Probability of K

### *M. pennsylvanicus*: optimal number of genetic clusters

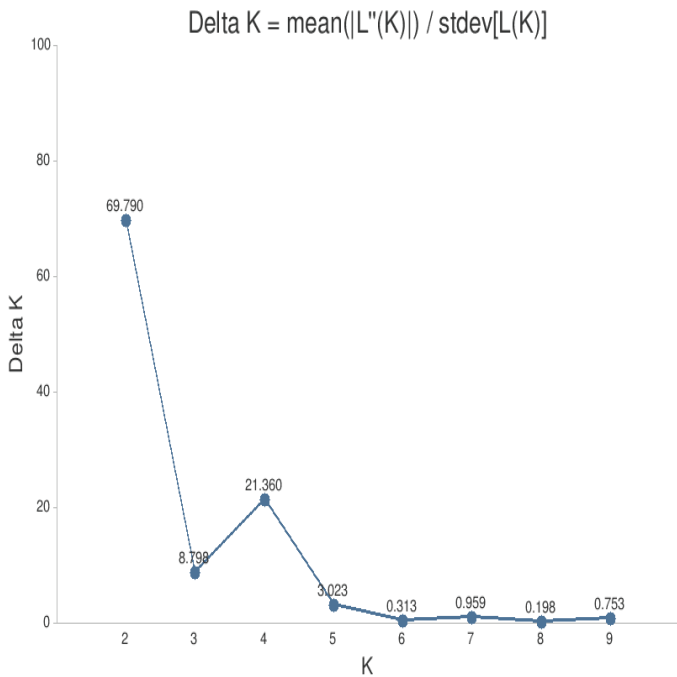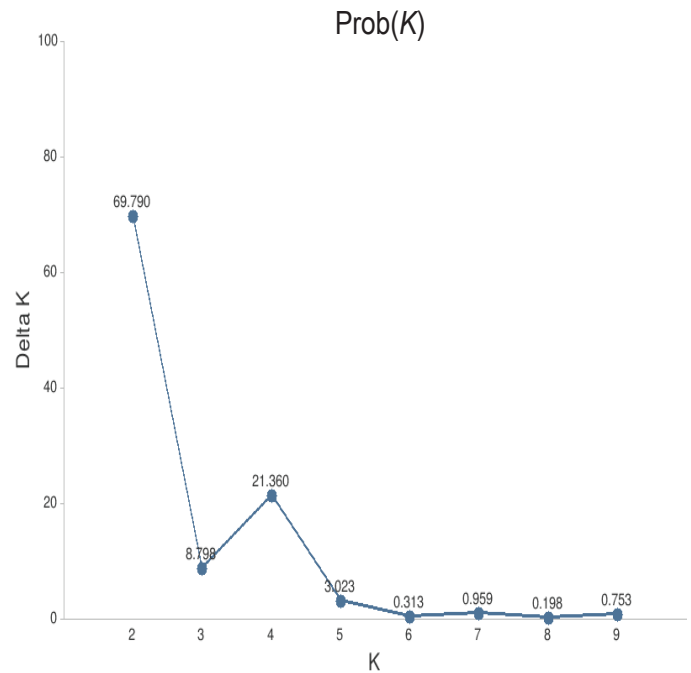

Delta K-statistic

Probability of K

**S4 Fig. Optimal number of genetic clusters in *M. ochrogaster* and *M. pennsylvanicus*.**

Evaluation of 10 replicates at K values 1–10 based on the 'ad hoc statistic'  $\Delta K$  and the probability of K.
