# Supplementary material for: Population connectivity in voles (Microtus sp.) as a gauge for tall grass prairie restoration in midwestern North America
Source: PubMed Central journal article supplement (PMC8659414; doi:10.1371/journal.pone.0260344), 2021-12-09
Supplement: pone.0260344.s005.pdf [file pone.0260344.s005.pdf]

## Power Analysis: potential to resolve population structure

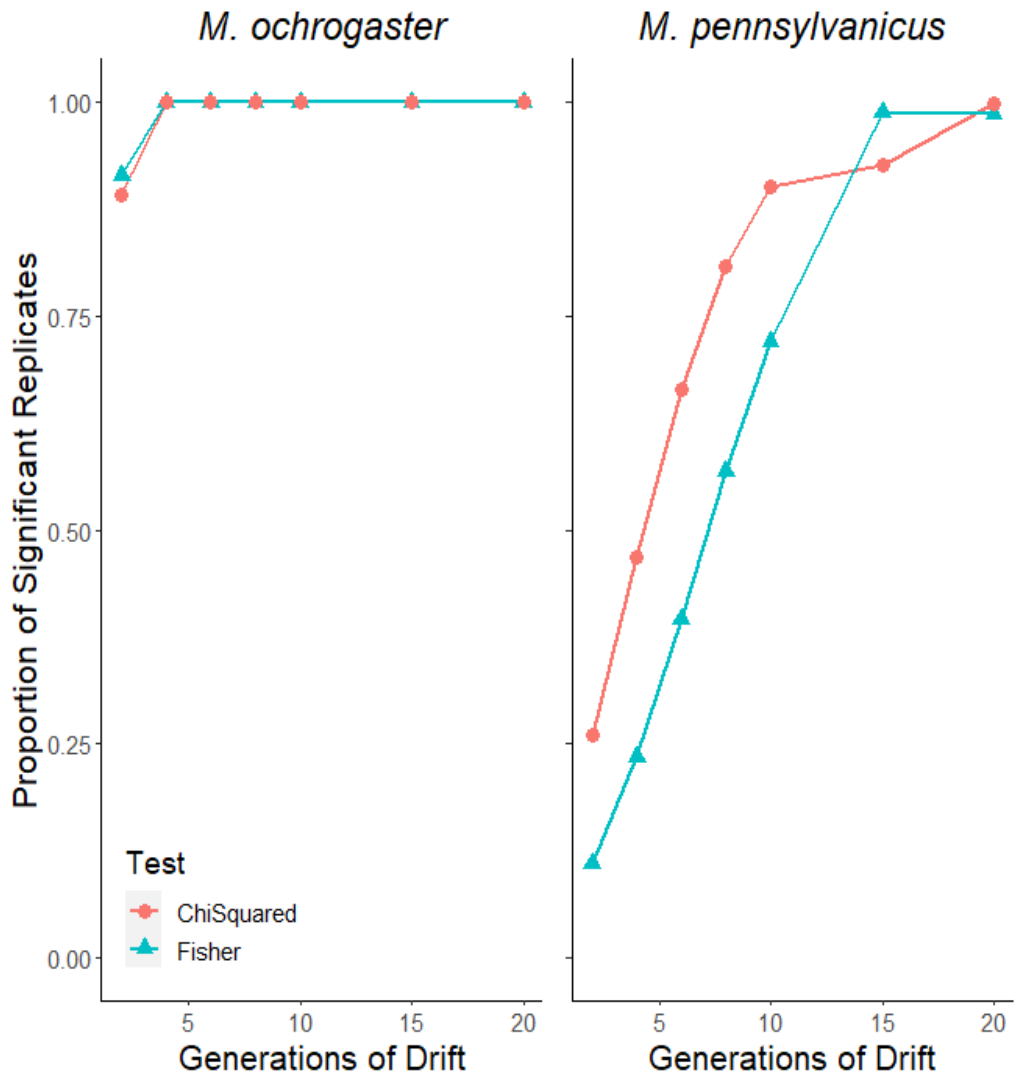

**S5 Fig. Power analysis *M. ochrogaster* and *M. pennsylvanicus*.**

Ability to resolve population structure as evaluated with two statistical measures ( $\chi^2$  and Fisher exact tests).
