# Supplementary material for: Population connectivity in voles (Microtus sp.) as a gauge for tall grass prairie restoration in midwestern North America
Source: PubMed Central journal article supplement (PMC8659414; doi:10.1371/journal.pone.0260344), 2021-12-09
Supplement: pone.0260344.s006.pdf [file pone.0260344.s006.pdf]

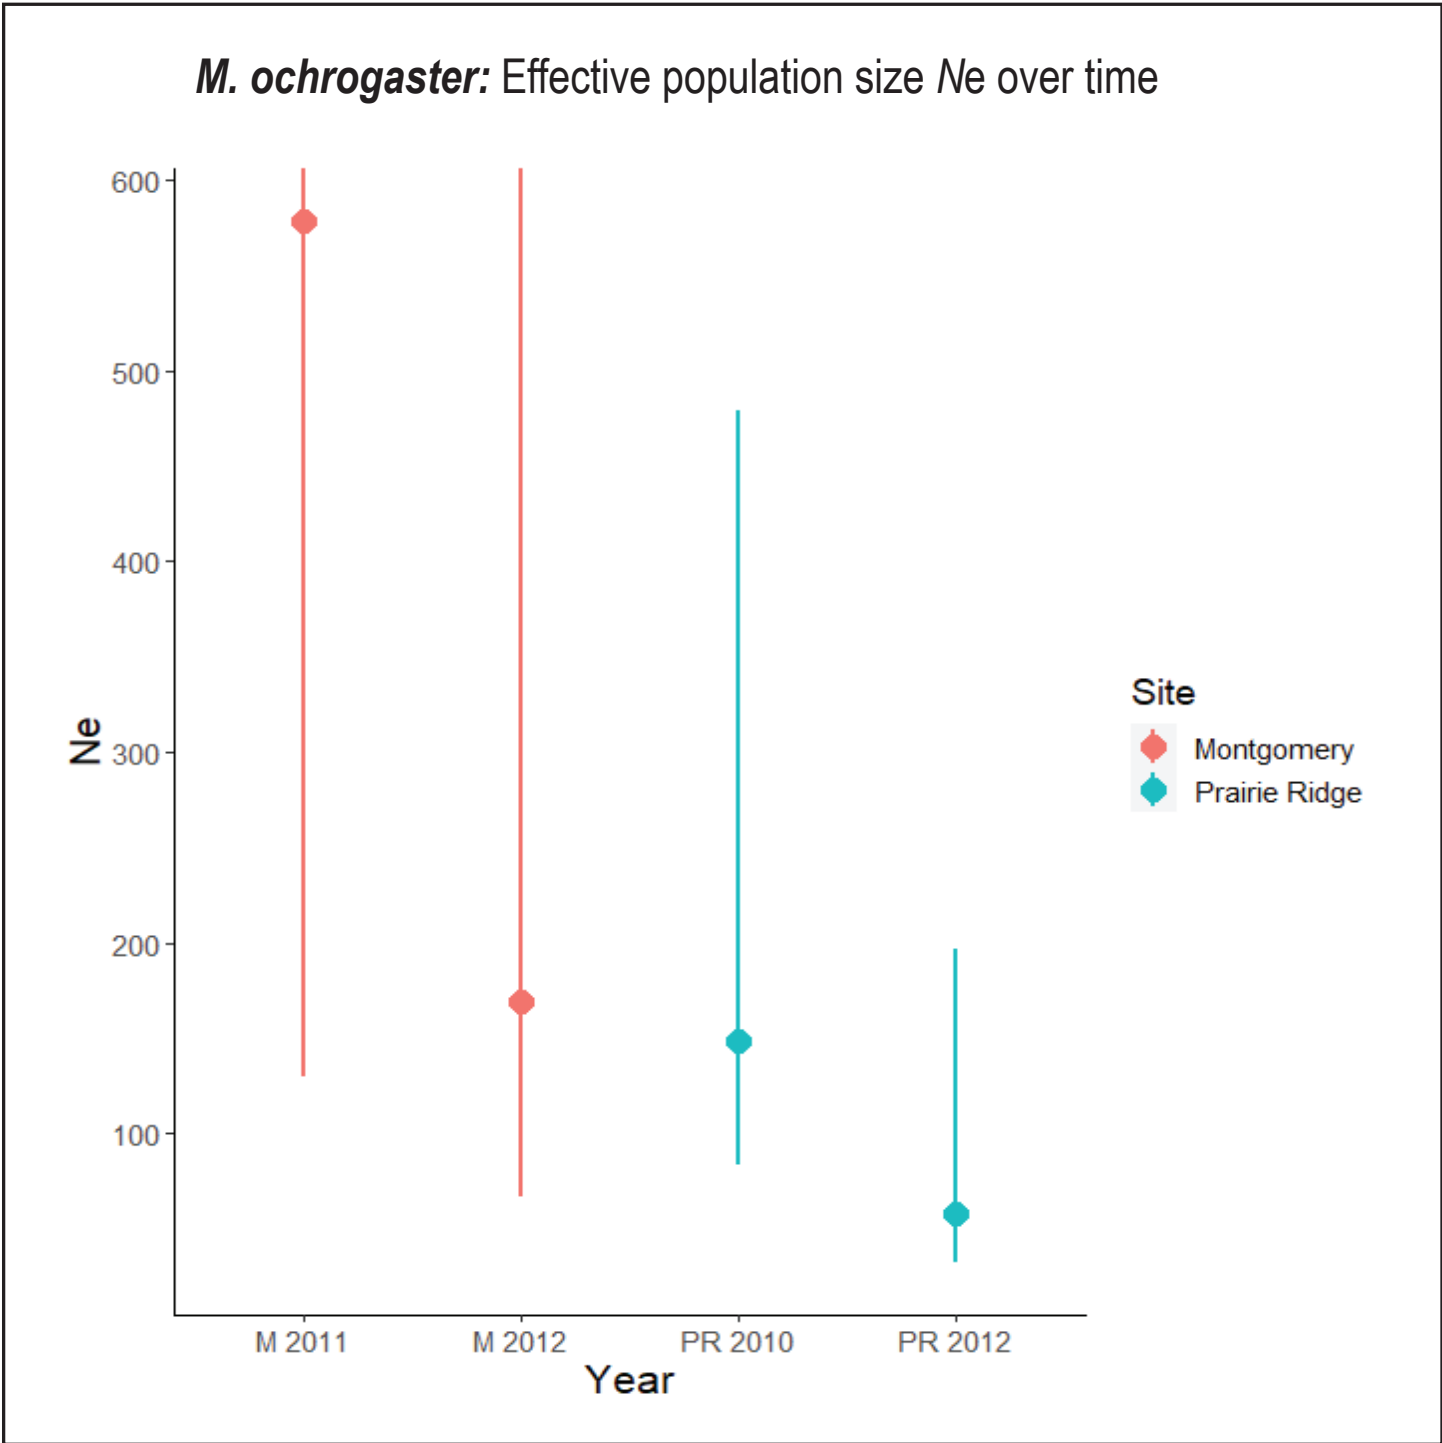

**S6 Fig. Temporal stability of effective population size  $N_e$  in *M. ochrogaster***  
Comparison of  $N_e$  estimates and 95% jackknife confidence intervals between years and two SAFE sites.
