# Supplementary material for: Population connectivity in voles (Microtus sp.) as a gauge for tall grass prairie restoration in midwestern North America
Source: PubMed Central journal article supplement (PMC8659414; doi:10.1371/journal.pone.0260344), 2021-12-09
Supplement: pone.0260344.s007.pdf [file pone.0260344.s007.pdf]

**S1 Table: SAFE study sites and patches**

SAFE sites and restoration patches within each listed by County. Provided for each patch are the following: Area = size of restoration patch (in ha); Latitude, Longitude = coordinates for geographic location; Code = acronym used to designate samples from each patch. Numbers of samples representing each species are listed as identified based on phenotype (FieldID) or genotype (GenID), with the MIOC = *M. ochrogaster* (prairie vole) and MIOC *M. pennsylvanicus* (the meadow vole). Locations of SAFE sites within Illinois are depicted in Figure 1.

| County                  | SAFE Site            | Patch        | Area<br>(ha) | Latitude  | Longitude | Code | FieldID    |            | GenID      |           |
|-------------------------|----------------------|--------------|--------------|-----------|-----------|------|------------|------------|------------|-----------|
|                         |                      |              |              |           |           |      | MIOC       | MIPE       | MIOC       | MIPE      |
| Livingston              | <b>Pontiac</b>       | Curve        | 37.19        | 41° 4' N  | 88° 42' E | POCU | 10         | -          | 10         | -         |
| Livingston              | <b>Pontiac</b>       | Treeline     | 20.31        | 41° 1' N  | 88° 38' E | POTR | 9          | -          | 9          | -         |
| Livingston              | <b>Pontiac</b>       | Tower        | 1.96         | 41° 1' N  | 88° 40' E | POTO | 6          | -          | 6          | -         |
| Livingston              | <b>Livingston</b>    | Hummel       | 51.1         | 40° 42' N | 88° 15' E | LIHU | 14         | 2          | 16         | -         |
| Livingston              | <b>Livingston</b>    | Marge        | 61.54        | 40° 41' N | 88° 16' E | LIMA | 13         | 3          | 13         | 3         |
| Livingston              | <b>Livingston</b>    | Dasso        | 6.48         | 40° 40' N | 88° 17' E | LIDA | -          | 3          | -          | 3         |
| McLean                  | <b>Saybrook</b>      | Radio North  | 58.86        | 40° 29' N | 88° 33' E | SARN | 2          | 4          | 2          | 5         |
| McLean                  | <b>Saybrook</b>      | Radio South  | 64.85        | 40° 29' N | 88° 33' E | SARS | 1          | 1          | -          | 1         |
| McLean                  | <b>Saybrook</b>      | Anchor North | 27.28        | 40° 29' N | 88° 31' E | SAAN | 3          | 11         | 3          | 11        |
| McLean                  | <b>Saybrook</b>      | Anchor South | 8.46         | 40° 29' N | 88° 31' E | SAAS | 2          | 9          | -          | 11        |
| McLean                  | <b>Saybrook</b>      | Anchor West  | 20.31        | 40° 29' N | 88° 31' E | SAAW | 5          | 22         | -          | 27        |
| McLean                  | <b>Saybrook</b>      | Old Say      | 27.05        | 40° 27' N | 88° 33' E | SAOS | -          | 22         | -          | 22        |
| Montgomery              | <b>Montgomery</b>    | Lane         | 15.74        | 39° 8' N  | 89° 26' E | MOLA | 14         | 18         | 32         | -         |
| Montgomery              | <b>Montgomery</b>    | Huber South  | 27.31        | 39° 7' N  | 89° 23' E | MOHU | 40         | 9          | 49         | -         |
| Jasper                  | <b>Prairie Ridge</b> | Tombstone    | 7.29         | 38° 56' N | 88° 11' E | PRTO | 26         | 26         | 52         | -         |
| Jasper                  | <b>Prairie Ridge</b> | Harvey       | 15.74        | 38° 53' N | 88° 9' E  | PRHA | 27         | 10         | 37         | -         |
| Jasper                  | <b>Prairie Ridge</b> | BW           | 38.67        | 38° 53' N | 88° 11' E | PRBW | 2          | -          | 2          | -         |
| <b>Total by species</b> |                      |              |              |           |           |      | <b>174</b> | <b>140</b> | <b>231</b> | <b>83</b> |
