# Supplementary material for: Population connectivity in voles (Microtus sp.) as a gauge for tall grass prairie restoration in midwestern North America
Source: PubMed Central journal article supplement (PMC8659414; doi:10.1371/journal.pone.0260344), 2021-12-09
Supplement: pone.0260344.s008.pdf [file pone.0260344.s008.pdf]

**S2 Table: Microsatellite DNA Loci**

Details of 23 microsatellite DNA loci successfully amplified in *M. ochrogaster* and *M. pennsylvanicus*. Loci were combined into six multiplex panels for data generation. Listed for each locus: Primer Name = published primer name; ABI Dye = fluorescent dye used to label forward primer; Motif = repeat motif; Citation = source of primer; Forward/ Reverse Primer = primer sequences. Amplifications were conducted in 10–15µl volume polymerase chain reactions (PCR) using 1X *Flexi*-buffer (PROMEGA), 2.5–3.5mM MgCl<sub>2</sub>, 0.25mM dNTPs, 0.2µg BSA, 1 unit *Go*-taq polymerase (PROMEGA), 0.1µM of each forward and reverse primer, and approximately 10–15ng template DNA. Reactions were carried out under the following conditions: initial denaturation at 94°C for 3min, followed by 15 cycles of 94°C for 45s, 55°C annealing temperature for 45s, and a 72°C extension for 30s, followed by an additional 25 cycles of 95°C for 30s, 55°C annealing temperature for 30s, and a 72°C extension for 15s, followed by a final extension at 72°C for 3min.

| Multiplex | Primer Name | ABI Dye | Motif                                 | Citation               | Forward Primer           | Reverse Primer              |
|-----------|-------------|---------|---------------------------------------|------------------------|--------------------------|-----------------------------|
| 1         | AV14        | 6-FAM   | (GATA) <sub>16</sub>                  | Stewart et al. 1998    | TATGTGATATGGCACTAGCATGT  | AGCCTGTCTCAGCAGAAGG         |
|           | Ma35        | VIC     | (GT) <sub>18</sub>                    | Gauffre et al. 2007    | AGAGTATGGCTGAGGGTG       | GCCAGAGCAGTGTGATG           |
|           | AV15        | NED     | (GATA) <sub>14</sub>                  | Stewart et al. 1998    | TATATGGAAGGTCGTAGATTCAG  | ATTAAGCATTGTGTGAGAAAGC      |
|           | AV13        | PET     | (GATA) <sub>14</sub>                  | Stewart et al. 1998    | CTGGCTCTATCTATCTGTCTATC  | ACAATTACAGCATCCAGAAG        |
| 2         | AT23        | 6-FAM   | (TG) <sub>20</sub>                    | Berthier et al. 2004   | GGATCATCTTCGCTAAGGAG     | CCATCTCAGGCCTAATTCAG        |
|           | MSMM-3      | VIC     | (CA) <sub>15</sub>                    | Ishibashi et al. 1999  | TACGCCCCCTTCAAACCTCATGTG | TCCTTTATCTTAGGTGATGGAG      |
|           | MSMM-2      | NED     | (CA) <sub>21</sub> (GA) <sub>22</sub> | Ishibashi et al. 1999  | TAACCACAACCCCTCCAACCTG   | TCATTTGGAGTTGCTGAGAAC       |
|           | MSMM-6      | PET     | (CA) <sub>18</sub>                    | Ishibashi et al. 1999  | TACAAATCTATCCTCTGACCTC   | TACAAAGCCATTGTTCCCTGCT      |
| 3         | Mar076      | VIC     | (AC) <sub>16</sub>                    | Walser and Heckel 2008 | TCACCAGGACCTACTGAGCA     | GCCAGCTTCATTTCAAGAGG        |
|           | Cg17A7      | NED     | (ATGT) <sub>9</sub>                   | Rikalainen et al. 2008 | ACATTCAAACCTATGGGACA     | GAAGGCTATTGATCTGCAC         |
|           | Ma66        | PET     | (TG) <sub>24</sub>                    | Gauffre et al. 2007    | AAGGTCTGGTGGATGTCAGG     | TGCAAGGCAGGATTCTACC         |
|           | LIST3-005   | PET     | (GT) <sub>21</sub>                    | Barker et al. 2005     | ATGAGGCTTCTTTCTATGTCC    | CCTGCTCTGTATGCTTTGA         |
| 4         | Mar113      | 6-FAM   | (AC) <sub>12</sub>                    | Walser and Heckel 2008 | AAGAGCCTGCTGTGGTTTGT     | TCAGCTGGGAATCAGGTCTT        |
|           | Mar003      | VIC     | (TG) <sub>21</sub>                    | Walser and Heckel 2008 | GGAGATACAAGGCCAAACA      | TGGCATTAGATGACCTGTGG        |
|           | Ma-09       | NED     | (AC) <sub>18</sub>                    | Gauffre et al. 2007    | CCCTAAGGAATAGCATCTGAG    | GAATGTATGTGGAAGCCAGG        |
|           | Mar016      | PET     | (CA) <sub>19</sub>                    | Walser and Heckel 2008 | CATCATCTTCTGGGGCACTG     | ACGGTCTGTGCAAACCACTT        |
| 5         | MAG25       | 6-FAM   | (CA) <sub>17</sub>                    | Jaarola et al. 2007    | TGGGATAGCCTAGCAGCAAGA    | GTTTGTAGGGTTAGGTTCTCAGTTG   |
|           | AT2         | VIC     | (TC) <sub>20</sub>                    | Berthier et al. 2004   | CAAAGAGGAAGTGCTAGGTTGG   | ACCCTTGGGACTCTGTTTGC        |
|           | Mar063      | PET     | (AC) <sub>23</sub>                    | Walser and Heckel 2008 | GCCTGGACACAACCAACTT      | GGCTATGGGCAGCTCCTC          |
|           | MSMM-5      | 6-FAM   | (CA) <sub>17</sub>                    | Ishibashi et al. 1999  | TCTAATACCCTTCTCTGGG      | TCCTATCAAGGGCAGTTCATCT      |
| 6         | MAG18       | VIC     | (AC) <sub>22</sub>                    | Jaarola et al. 2007    | GTATGCCTGCTATTGTGAAGAC   | GTTTGCTCTTTGCTCCCAGTAACTCAC |
|           | MAG26       | NED     | (AG) <sub>31</sub>                    | Jaarola et al. 2007    | CCTCTCAAAGCAGTTAAGC      | GTTTAGCGTTACTATTGTAGCC      |
|           | MSMM-4      | PET     | (CA) <sub>19</sub>                    | Ishibashi et al. 1999  | TGTTTCAAGGCAATAAGGTGG    | TCGTTTCCCTGGAGATTGGG        |

## References Cited:

- Barker FS, Helyar J, SJ Kemp, Begon M. Highly polymorphic microsatellite loci in the bank vole (*Clethrionomys glareolus*). Mol Ecol Notes. 2005; 5: 311–313. <https://doi.org/10.1111/j.1471-8286.2005.00911.x>
- Berthier K, Galan M, Weber A, Loiseau A, Cosson JF. A multiplex panel of dinucleotide microsatellite markers for the water vole, *Arvicola terrestris*. Mol Ecol Notes. 2004; 7: 620–622. <https://doi.org/10.1111/j.1471-8286.2004.00756.x>
- Gauffre B, Galan M, Bretagnolle V, Cosson JF. Polymorphic microsatellite loci and PCR multiplexing in the common vole, *Microtus arvalis*. Mol. Ecol. Notes 2007; 7: 830–832. <https://doi.org/10.1111/j.1471-8286.2007.01718.x>
- Ishibashi Y, Yoshinaga Y, Saitoh T, Abe S, Iida H, Yoshida MC. Polymorphic microsatellite DNA markers in the field vole *Microtus montebelli*. Mol Ecol. 1999; 8: 163–164. PMID: 9919707
- Jaarola M, Ratkiewicz M, Ashford RT, Brunhoff C, Borkowksa A. Isolation and characterization of polymorphic microsatellite loci in the field vole, *Microtus agrestis*, and their cross-utility in the common vole, *Microtus arvalis*. Mol Ecol Notes. 2007; 7: 1029–1031. <https://doi.org/10.1111/j.1471-8286.2007.01763.x>
- Rikalainen K, Grapputo A, Knott E, Koskela E, Mappes T. A large panel of novel microsatellite markers for the bank vole (*Myodes glareolus*). Mol Ecol Res. 2008; 8: 1164–1168. <https://doi.org/10.1111/j.1755-0998.2008.02228.x>
- Stewart WA, Piertney WA, Dallas DF. Isolation and characterization of highly polymorphic microsatellites in the water vole, *Arvicola terrestris*. Mol Ecol. 1998; 7: 1247–1263. PMID: 9734085
- Walser B, Heckel G. Microsatellite markers for the common vole (*Microtus arvalis*) and their cross-species utility. Cons Gen. 2008; 9: 479–481. <https://doi.org/10.1007/s10592-007-9355-6>
