# Supplementary material for: Population connectivity in voles (Microtus sp.) as a gauge for tall grass prairie restoration in midwestern North America
Source: PubMed Central journal article supplement (PMC8659414; doi:10.1371/journal.pone.0260344), 2021-12-09
Supplement: pone.0260344.s009.pdf [file pone.0260344.s009.pdf]

**S3 Table: Pairwise  $F_{ST}$**

**S3 Table. Pairwise  $F_{ST}$  values for *M. ochrogaster* by year between restoration patches collect at SAFE sites (= Site) in 2010 (upper panel) and 2012 (lower panel). Data were derived from 15 microsatellite DNA loci.  $F_{ST}$  values are below the diagonal and  $p$ -values above the diagonal. Bonferroni-adjusted statistical significance: 2010  $p < 0.003$  and 2012  $p < 0.008$ . Significant values are in bold.**

| <b>2010 - Site</b> | <b>Patch</b> | <b>L-H</b> | <b>L-M</b> | <b>P-C</b> | <b>P-T</b> | <b>PR-H</b> | <b>PR-T</b>  |
|--------------------|--------------|------------|------------|------------|------------|-------------|--------------|
| Livingston         | Hummel       | X          | 0.893      | 0.024      | 0.475      | 0.079       | <b>0.002</b> |
| Livingston         | Marge        | 0.020      | X          | 0.601      | 0.783      | 0.580       | <b>0.001</b> |
| Pontiac            | Curve        | 0.031      | 0.028      | X          | 0.923      | 0.156       | <b>0.001</b> |
| Pontiac            | Tower        | 0.037      | 0.036      | 0.036      | X          | 0.534       | 0.090        |
| Prairie Ridge      | Harvey       | 0.017      | 0.017      | 0.022      | 0.029      | X           | <b>0.001</b> |
| Prairie Ridge      | Tombstone    | 0.025      | 0.029      | 0.033      | 0.038      | 0.018       | X            |

| <b>2012 - Site</b> | <b>Patch</b> | <b>M-H</b> | <b>M-L</b> | <b>PR-H</b>  | <b>PR-T</b>  |
|--------------------|--------------|------------|------------|--------------|--------------|
| Montgomery         | Huber        | X          | 0.023      | <b>0.006</b> | 0.012        |
| Montgomery         | Lane         | 0.025      | X          | 0.011        | <b>0.001</b> |
| Prairie Ridge      | Harvey       | 0.055      | 0.044      | X            | 0.013        |
| Prairie Ridge      | Tombstone    | 0.027      | 0.023      | 0.043        | X            |
