# Supplementary material for: Population connectivity in voles (Microtus sp.) as a gauge for tall grass prairie restoration in midwestern North America
Source: PubMed Central journal article supplement (PMC8659414; doi:10.1371/journal.pone.0260344), 2021-12-09
Supplement: pone.0260344.s010.pdf [file pone.0260344.s010.pdf]

**S4 Table: Average relatedness ( $r$ )**

**S4 Table. Average relatedness ( $r$ ) in *M. ochrogaster* by year and patch.** Data were derived from 15 microsatellite DNA loci. Samples are listed by year for each SAFE site and restoration patch for which estimates could be obtained.  $N$  = numbers of samples by patch;  $r$  = average relatedness; Variance = variance of average relatedness.

| <b>Site</b>   | <b>Patch</b> | <b><math>N</math></b> | <b><math>r</math></b> | <b>Variance</b> |
|---------------|--------------|-----------------------|-----------------------|-----------------|
| <b>2010</b>   |              |                       |                       |                 |
| Livingston    | Hummel       | 13                    | 0.037                 | 0.004           |
| Livingston    | Marge        | 11                    | 0.027                 | 0.002           |
| Pontiac       | Curve        | 9                     | 0.025                 | 0.001           |
| Pontiac       | Tower        | 5                     | 0.009                 | 0.000           |
| Prairie Ridge | Harvey       | 28                    | 0.031                 | 0.004           |
| Prairie Ridge | Tombstone    | 26                    | 0.050                 | 0.007           |
| <b>2011</b>   |              |                       |                       |                 |
| Montgomery    | Huber        | 34                    | 0.027                 | 0.006           |
| Montgomery    | Lane         | 8                     | 0.058                 | 0.015           |
| <b>2012</b>   |              |                       |                       |                 |
| Montgomery    | Huber        | 11                    | 0.026                 | 0.005           |
| Montgomery    | Lane         | 24                    | 0.039                 | 0.013           |
| Prairie Ridge | Harvey       | 6                     | 0.106                 | 0.060           |
| Prairie Ridge | Tombstone    | 24                    | 0.052                 | 0.017           |
