# Supplementary material for: Population connectivity in voles (Microtus sp.) as a gauge for tall grass prairie restoration in midwestern North America
Source: PubMed Central journal article supplement (PMC8659414; doi:10.1371/journal.pone.0260344), 2021-12-09
Supplement: pone.0260344.s011.pdf [file pone.0260344.s011.pdf]

**S5 Table: Population genetic parameters for five prairie species**

**S5 Table. Comparison of population genetic and life history parameters for five prairie species in Illinois, including two voles and three birds**

| Parameter | MIOC       | MIPE       | PHCO     | TYCU                | COVI     |
|-----------|------------|------------|----------|---------------------|----------|
| Loci      | 15         | 15         | 19       | 21                  | 11       |
| $A_R$     | 12.5       | 12         | 5.34     | 5.35                | 8.63     |
| $H_o$     | 0.8        | 0.7        | 0.62     | 0.65                | 0.71     |
| $F_{ST}$  | 1%         | -          | 100%     | 100%                | 100%     |
| $N_e$     | 103        | 239        | 43       | 13                  | 62.1     |
| $r$       | 0.04       | -          | 0.15     | 0.31                | 0.02     |
| Breeding  | Monogamy   | Polygyny   | Polygyny | Polygyny            | Monogamy |
| Source    | this study | this study |          | Douglas et al. 2020 |          |

MIOC = *M. ochrogaster*; MIPE = *M. pennsylvanicus*; PHCO = *Phasianus colchicus* (common pheasant); TYCO = *Tympanuchus cupido pinnatus* (greater prairie chicken); COVI = *Colinus virginianus* (northern bobwhite quail). Loci = number of microsatellite DNA loci;  $A_R$  = average allelic richness;  $H_o$  = observed heterozygosity;  $F_{ST}$  = gene flow;  $N_e$  = effective population size;  $r$  = average relatedness.

**Source**

Douglas MR, Anthonyamy WJB, Mussmann SM, Davis MA, Louis W, Douglas ME. Multi-targeted management of upland game birds at the agroecosystem interface of Midwestern North America. PLoS ONE Biodiversity. 2020; 15(4): e0230735.

<https://doi.org/10.1371/journal.pone.0230735>
